# Supplementary material for: Severe hospital events following symptomatic infection with Sars-CoV-2 Omicron and Delta variants in France, December 2021 – January 2022: a retrospective, population-based, matched cohort study
Source: bioRxiv or medRxiv preprint supplement (doi:10.1101/2022.02.02.22269952), 2022-03-07
Supplement: Supplementary file [file media-2.pdf]

## Hospital admissions following symptomatic infection with Sars-CoV-2 Omicron and Delta variants

Santé publique France - 12 rue du Val d'Osne - 94415 Saint-Maurice – France

### Methods

In our main paper<sup>1</sup>, the outcome was the occurrence of a serious hospital event. In this supplement, the results are presented with hospital admissions as the outcome. The event is the first hospital admissions following virological diagnosis (or the day of diagnosis), regardless of the type of ward. Apart from this definition of the outcome, all methods are those of the main paper.

### Results

Table 1. Hospital admissions observed during the follow-up period, December 2021-January 2022, France, (n= 149,064)

| Characteristic      | DELTA, N = 74,5321 | OMICRON, N = 74,5321 | p-value |
|---------------------|--------------------|----------------------|---------|
| Hospital admissions | 1,097 (1.5%)       | 214 (0.3%)           | <0.001  |

Figure 1. Evolution since the virological diagnosis of the cumulative probability of hospital admissions among cases infected by the Omicron or Delta variant of the SARS-CoV-2, December 2021-January 2022, France, (n= 149,064)

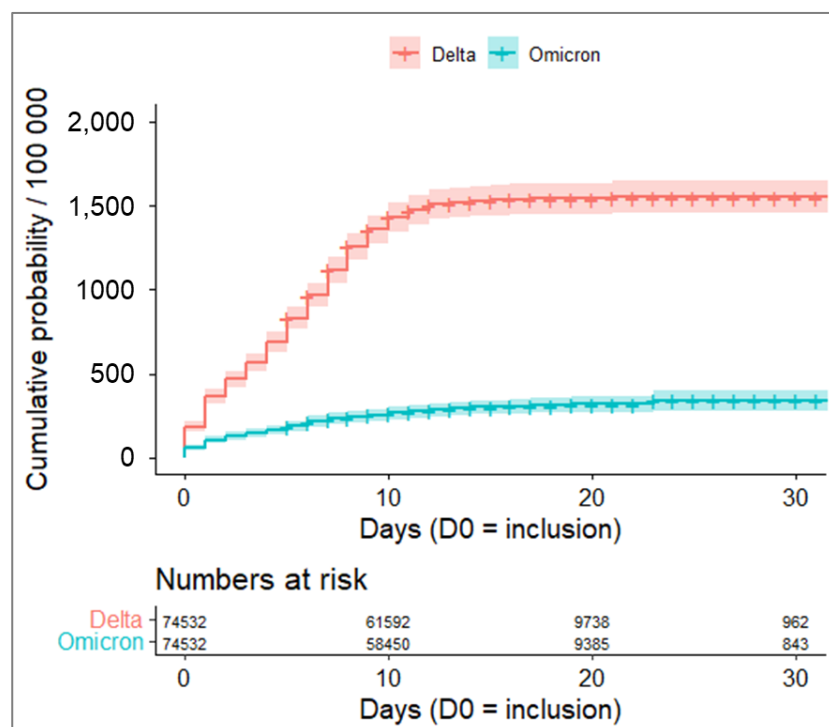

<sup>1</sup> Serious hospital events following symptomatic infection with Sars-CoV-2 Omicron and Delta variants: an exposed-unexposed cohort study in December 2021 from the COVID-19 surveillance databases in France

In the DELTA arm of the cohort, 98% of hospital admissions were observed within 14 days of positive sampling, and 100% within 21 days. In theOMICRON arm, 89% of events occurred within 14 days and 94% within 21 days (Figure 1).

Table 2. Univariate analysis using Cox regression for the risk of hospital admissions among cases infected by the Omicron or Delta variant of the SARS-CoV-2, December 2021-January 2022, France (n= 149,064)

|             |                     | cHR <sup>1</sup> | 95% CI <sup>1</sup> | p-value |
|-------------|---------------------|------------------|---------------------|---------|
| Variant     | DELTA               | Ref              | -                   | -       |
|             | OMICRON             | 0.20             | [0.17 - 0.23]       | <0.001  |
| Age         | [18,40)             | 0.20             | [0.17 - 0.24]       | <0.001  |
|             | [40,65)             | Ref              | -                   | -       |
|             | [65,80)             | 4.85             | [4.24 - 5.54]       | <0.001  |
|             | [80,Inf)            | 14.84            | [12.74 - 17.3]      | <0.001  |
| Sex         | F                   | Ref              | -                   | -       |
|             | M                   | 1.57             | [1.41 - 1.75]       | <0.001  |
| Vaccination | Unvaccinated        | Ref              | -                   | -       |
|             | Primary vaccination | 0.16             | [0.14 - 0.18]       | <0.001  |
|             | Booster             | 0.36             | [0.3 - 0.44]        | <0.001  |
| Comorbidity | None                | Ref              | -                   | -       |
|             | Medium-risk         | 5.49             | [4.88 - 6.18]       | <0.001  |
|             | Very-high-risk      | 8.20             | [6.91 - 9.74]       | <0.001  |

<sup>1</sup>cHR = crude Hazard Ratio, CI = Confidence Interval

Table 3. Cumulative probability at D21 of hospital admissions among cases infected by the Omicron or Delta variant of the SARS-CoV-2, stratified by co-variables, December 2021-January 2022, France, (n= 149,064)

|             |                     | DELTA  |                 | OMICRON |               |
|-------------|---------------------|--------|-----------------|---------|---------------|
| Age         | [18,40)             | 355    | [297 - 413]     | 57      | [34 - 80]     |
|             | [40,65)             | 1,808  | [1645 - 1972]   | 286     | [218 - 354]   |
|             | [65,80)             | 8,035  | [7117 - 8943]   | 1,812   | [1318 - 2303] |
|             | [80,Inf)            | 21,094 | [18253 - 23837] | 6,475   | [4717 - 8201] |
| Sex         | F                   | 1,215  | [1105 - 1325]   | 235     | [186 - 284]   |
|             | M                   | 1,919  | [1768 - 2069]   | 380     | [311 - 448]   |
| Vaccination | Unvaccinated        | 3,122  | [2901 - 3342]   | 640     | [490 - 790]   |
|             | Primary vaccination | 596    | [523 - 669]     | 178     | [140 - 216]   |
|             | Booster             | 1,838  | [1423 - 2251]   | 514     | [366 - 662]   |
| Comorbidity | None                | 936    | [859 - 1014]    | 168     | [135 - 201]   |
|             | Medium-risk         | 4,579  | [4133 - 5023]   | 1,103   | [853 - 1352]  |
|             | Very-high-risk      | 6,587  | [5491 - 7671]   | 1,697   | [1073 - 2317] |

Kaplan-Meier estimator and 95% CI

The multivariate Cox proportional-hazards model showed an interaction between variant and vaccination (Table 1). There was an increased hazard for primo-vaccinated individuals when they were infected by Omicron. This interaction had not been demonstrated in the models with serious hospital event as the outcome.

*Table 4. Multivariate analysis using Cox regression for the risk of hospital admissions among cases infected by the Omicron or Delta variant of the SARS-CoV-2, stratified by age, December 2021-January 2022, France (n= 149,064)*

|                               | aHR <sup>1</sup> | 95% CI <sup>1</sup> | p-value |
|-------------------------------|------------------|---------------------|---------|
| Variant                       |                  |                     |         |
| DELTA                         | Ref              | —                   |         |
| OMICRON                       | 0.16             | 0.11 – 0.22         | <0.001  |
| Age                           |                  |                     |         |
| [18,40)                       | 0.21             | 0.17 – 0.25         | <0.001  |
| [40,65)                       | Ref              | —                   |         |
| [65,80)                       | 3.85             | 3.30 – 4.49         | <0.001  |
| [80,Inf)                      | 9.02             | 7.43 – 10.9         | <0.001  |
| Sex                           |                  |                     |         |
| F                             | Ref              | —                   |         |
| M                             | 1.67             | 1.50 – 1.87         | <0.001  |
| Vaccination                   |                  |                     |         |
| Unvaccinated                  | Ref              | —                   |         |
| Primary vaccination           | 0.21             | 0.18 – 0.24         | <0.001  |
| Booster                       | 0.20             | 0.16 – 0.25         | <0.001  |
| Comorbidity                   |                  |                     |         |
| None                          | Ref              | —                   |         |
| Other                         | 2.41             | 2.11 – 2.75         | <0.001  |
| Very High Risk                | 3.28             | 2.72 – 3.96         | <0.001  |
| Variant * Age                 |                  |                     |         |
| OMICRON * [18,40)             | 1.08             | 0.66 – 1.77         | 0.8     |
| OMICRON * [65,80)             | 1.58             | 1.07 – 2.34         | 0.021   |
| OMICRON * [80,Inf)            | 2.70             | 1.77 – 4.11         | <0.001  |
| Variant * Vaccination         |                  |                     |         |
| OMICRON * Primary vaccination | 1.71             | 1.21 – 2.42         | 0.002   |
| OMICRON * Booster             | 0.94             | 0.60 – 1.48         | 0.8     |

<sup>1</sup>HR = adjusted Hazard Ratio, CI = Confidence Interval
